# Supplementary material for: Morphological control and plasmonic tuning of nanoporous gold disks by surface modifications
Source: Royal Society of Chemistry journal article supplement (doi:10.1039/c4tc02328e), 2014-11-19
Supplement: c4tc02328e1.pdf [file c4tc02328e1.pdf]

## Electronic Supplementary Information (ESI) for

### Morphological control and plasmonic tuning of nanoporous gold disks by surface modifications

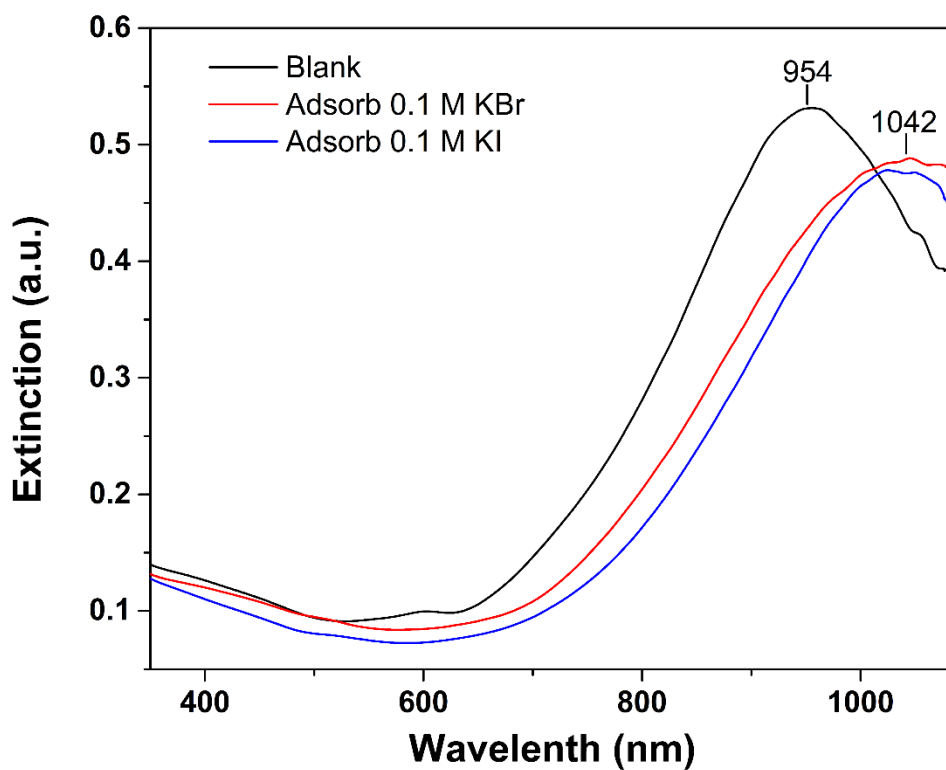

**Figure S1.** Extinction spectra of NPGDs (black line), NPGDs adsorb KBr (red line) and KI (blue line). NPGDs were incubated with 0.1 M KBr and KI for 30 min, then the as-prepared samples were measured in the air condition.

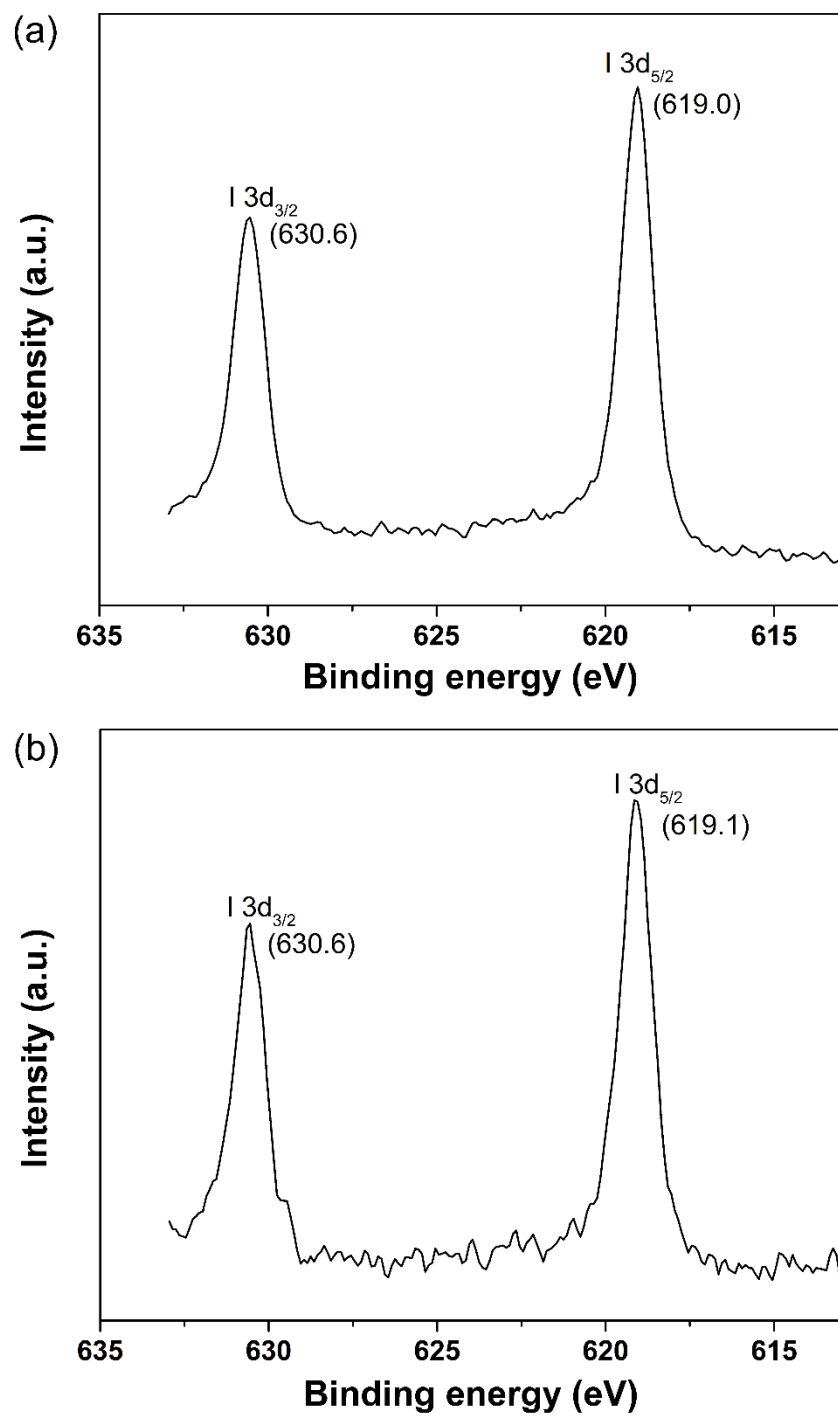

**Figure S2.** XPS spectra of iodide: (a) KI adsorbed on Ag<sub>70</sub>Au<sub>30</sub> alloy before dealloying, and (b) KI-induced NPGDs dealloying. The alloy was first incubated with 0.1 M KI and then dealloyed in concentrated nitric acid.
